# Supplementary material for: Oligomeric State of β-Coronavirus Non-Structural Protein 10 Stimulators Studied by Small Angle X-ray Scattering
Source: MDPI journal article supplement (doi:10.3390/ijms241713649), 2023-09-04
Supplement: s1 [file s1]

## Supplementary Information

### **Oligomeric state of $\beta$ -coronavirus non-structural protein 10 stimulators studied by Small Angle X-ray Scattering**

**Wolfgang Knecht <sup>1</sup>, Zoë Fisher <sup>1,2</sup>, Jiaqi Lou <sup>3</sup>, Céleste Sele <sup>1</sup>, Shumeng Ma <sup>3</sup>, Anna  
Andersson Rasmussen <sup>1</sup>, Nikos Pinotsis <sup>4</sup> and Frank Kozielski <sup>3</sup>**

<sup>1</sup> Department of Biology & Lund Protein Production Platform & Protein Production Sweden, Lund University, Sölvegatan 35, 22362 Lund, Sweden; [wolfgang.knecht@biol.lu.se](mailto:wolfgang.knecht@biol.lu.se); celeste.sele@biol.lu.se; anna.andersson\_rasmussen@biol.lu.se

<sup>2</sup> European Spallation Source ERIC, P.O. Box 176, 22100 Lund, Sweden; [Zoe.Fisher@ess.eu](mailto:Zoe.Fisher@ess.eu)

<sup>3</sup> School of Pharmacy, University College London, London, 29-39 Brunswick Square, London WC1N 1AX, United Kingdom; [jiaqi.lou.13@ucl.ac.uk](mailto:jiaqi.lou.13@ucl.ac.uk); shumeng.ma.20@ucl.ac.uk

<sup>4</sup> Institute of Structural and Molecular Biology, Birkbeck College, WC1E 7HX London, United Kingdom. [n.pinotsis@mail.cryst.bbk.ac.uk](mailto:n.pinotsis@mail.cryst.bbk.ac.uk)

Correspondence: [f.kozielski@ucl.ac.uk](mailto:f.kozielski@ucl.ac.uk)

## Contents

|                  |                                                                    |    |
|------------------|--------------------------------------------------------------------|----|
| <b>Table S1</b>  | Summary of nsp10 constructs from $\beta$ -CoVs                     | 3  |
| <b>Table S2</b>  | SAXS data collection and scattering parameters                     | 4  |
| <b>Figure S1</b> | Denatured high-resolution mass spectra (HRMS)                      | 6  |
| <b>Figure S2</b> | Representative OmniSEC traces                                      | 11 |
| <b>Figure S3</b> | SEC-MALS analysis of three SARS-CoV-2 nsp10 constructs.            | 12 |
| <b>Figure S4</b> | Scattering profiles for nsp10 samples in SEC-SAXS                  | 13 |
| <b>Figure S5</b> | Dimensionless Kratky plots for the nsp10 proteins measured by SAXS | 14 |

**Table S1.** Summary of nsp10 constructs from  $\beta$ -CoVs used in this study.

| <b>Protein construct and name</b>   | <b>Residue numbering</b> | <b>Original polypeptide numbering</b> | <b>Calculated MW after cleavage [Da]</b> | <b>Calculated pI after cleavage</b> |
|-------------------------------------|--------------------------|---------------------------------------|------------------------------------------|-------------------------------------|
| <b>Short SARS-CoV-2 nsp10</b>       | 10-133                   | Asn4264 - Gln4385                     | 13,272                                   | 7.70                                |
| <b>Long SARS-CoV-2 nsp10</b>        | 1-133                    | Ala4255 - Gln4385                     | 14,026                                   | 6.70                                |
| <b>Full-length SARS-CoV-2 nsp10</b> | 1-139                    | Ala4255 - Gln4391                     | 15,022                                   | 6.70                                |
| <b>Full-length MERS nsp10</b>       | 1-140                    | Ala4238 - Gln4378                     | 15,122                                   | 7.70                                |
| <b>Full-length SARS nsp10</b>       | 1-139                    | Ala4231- Gln4369                      | 15,075                                   | 6.70                                |

**Table S2.** SAXS data collection and scattering parameters for the  $\beta$ -CoV nsp10 proteins studied.

| Sample                                                       | SARS-CoV-2 nsp10                        |                |                | SARS nsp10     | MERS nsp10     |
|--------------------------------------------------------------|-----------------------------------------|----------------|----------------|----------------|----------------|
|                                                              | full-length                             | long           | short          | full-length    | full-length    |
| Data Collection parameters                                   |                                         |                |                |                |                |
| Instrument                                                   | B21 Beamline (Diamond Light Source, UK) |                |                |                |                |
| Beam size at sample (mm <sup>2</sup> )                       | 1.0 × 0.25                              |                |                |                |                |
| Wavelength (Å)                                               | 0.9464                                  |                |                |                |                |
| s-Range (Å <sup>-1</sup> )                                   | 0.0045-0.3400                           |                |                |                |                |
| Method                                                       | SEC-SAXS                                |                |                |                |                |
| Sample to Detector D (mm)                                    | 3722.0                                  |                |                |                |                |
| Temperature (K)                                              | 288                                     |                |                |                |                |
| Structural parameters                                        |                                         |                |                |                |                |
| R <sub>g</sub> (Å) (from Guinier)                            | 17.10 (± 0.14)                          | 16.35 (± 0.10) | 15.20 (± 0.12) | 17.19 (± 0.10) | 17.27 (± 0.10) |
| R <sub>g</sub> (Å) (from P(r))                               | 17.31 (± 0.01)                          | 16.64 (± 0.01) | 15.46 (± 0.01) | 17.40 (± 0.02) | 17.32 (± 0.01) |
| D <sub>max</sub> (Å)                                         | 59.0                                    | 57.0           | 51.4           | 59.4           | 53.3           |
| Porod volume estimate (Å <sup>3</sup> )*                     | 26542                                   | 23162          | 20976          | 24726          | 24363          |
| Molecular mass determination                                 |                                         |                |                |                |                |
| Molecular mass from Porod volume (V <sub>p</sub> * 0.6) (Da) | 15925                                   | 13897          | 12585          | 14836          | 14618          |
| Molecular mass from forward scattering (Da)                  | 15395 (± 268)                           | 13985 (± 291)  | 9324 (± 161)   | 20841 (± 63)   | 14328 (± 44)   |
| Molecular mass from sequence (Da)                            | 15151                                   | 14026          | 13272          | 14843          | 14891          |
| Software                                                     |                                         |                |                |                |                |

|                          |                                                         |
|--------------------------|---------------------------------------------------------|
|                          |                                                         |
| Data processing          | ATSAS v3.2.1 (CHROMIX, PRIMUS, GNOM)                    |
| Modelling                | DAMMIF, DAMMIN ( <i>ab initio</i> ), BUNCH (rigid body) |
| Atomic models scattering | CRY SOL                                                 |

\*Porod Volume was calculated through Dammif.

A

# Full-length SARS-CoV-2 nsp10

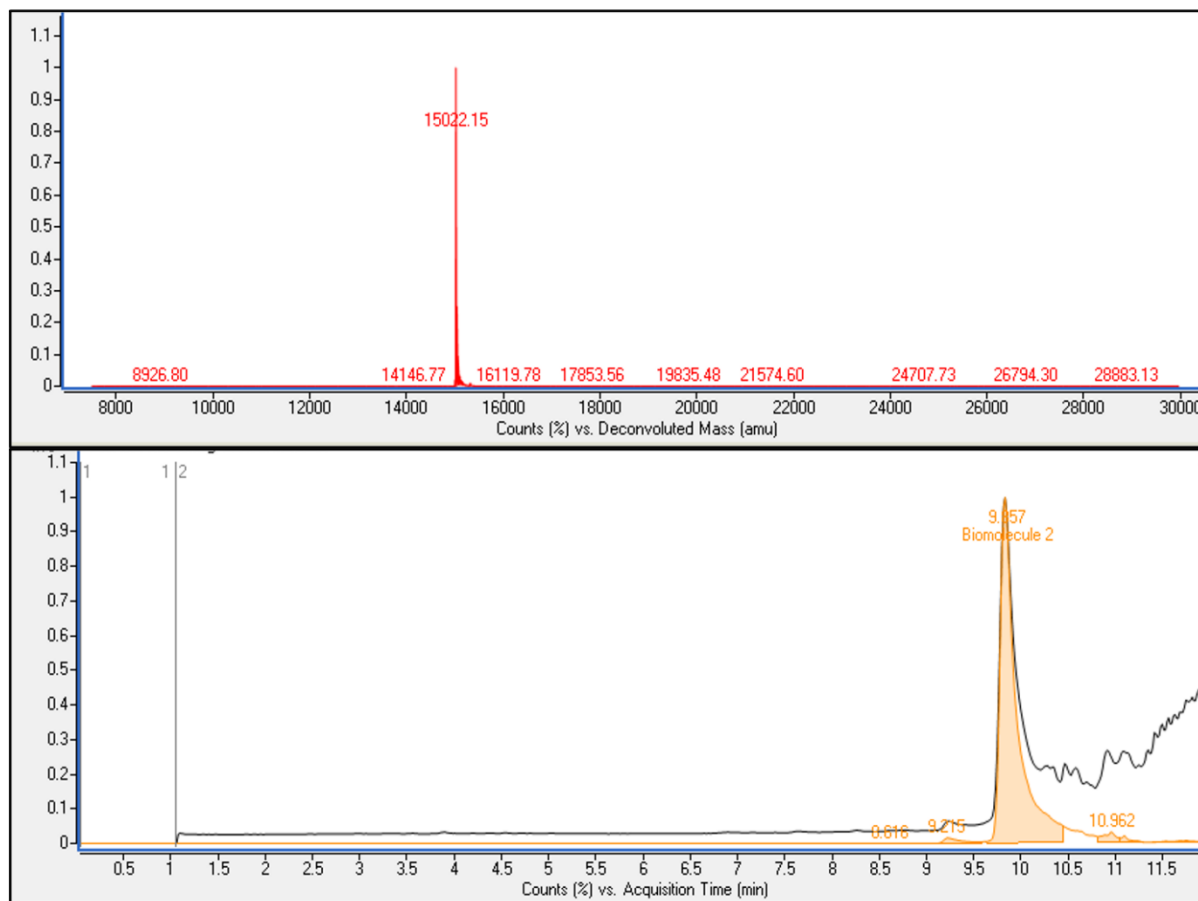

**B**

Long SARS-CoV-2 nsp10

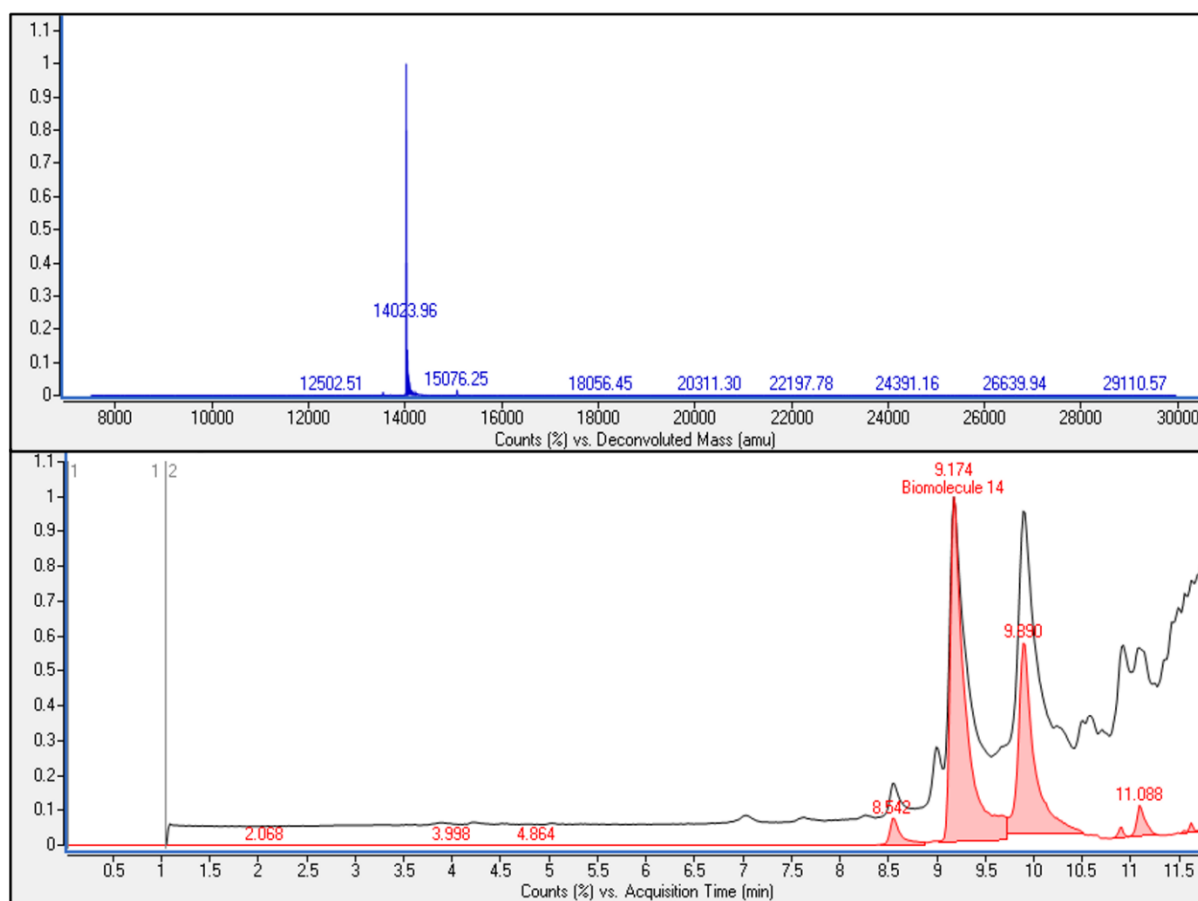

C

### Short SARS-CoV-2 nsp10

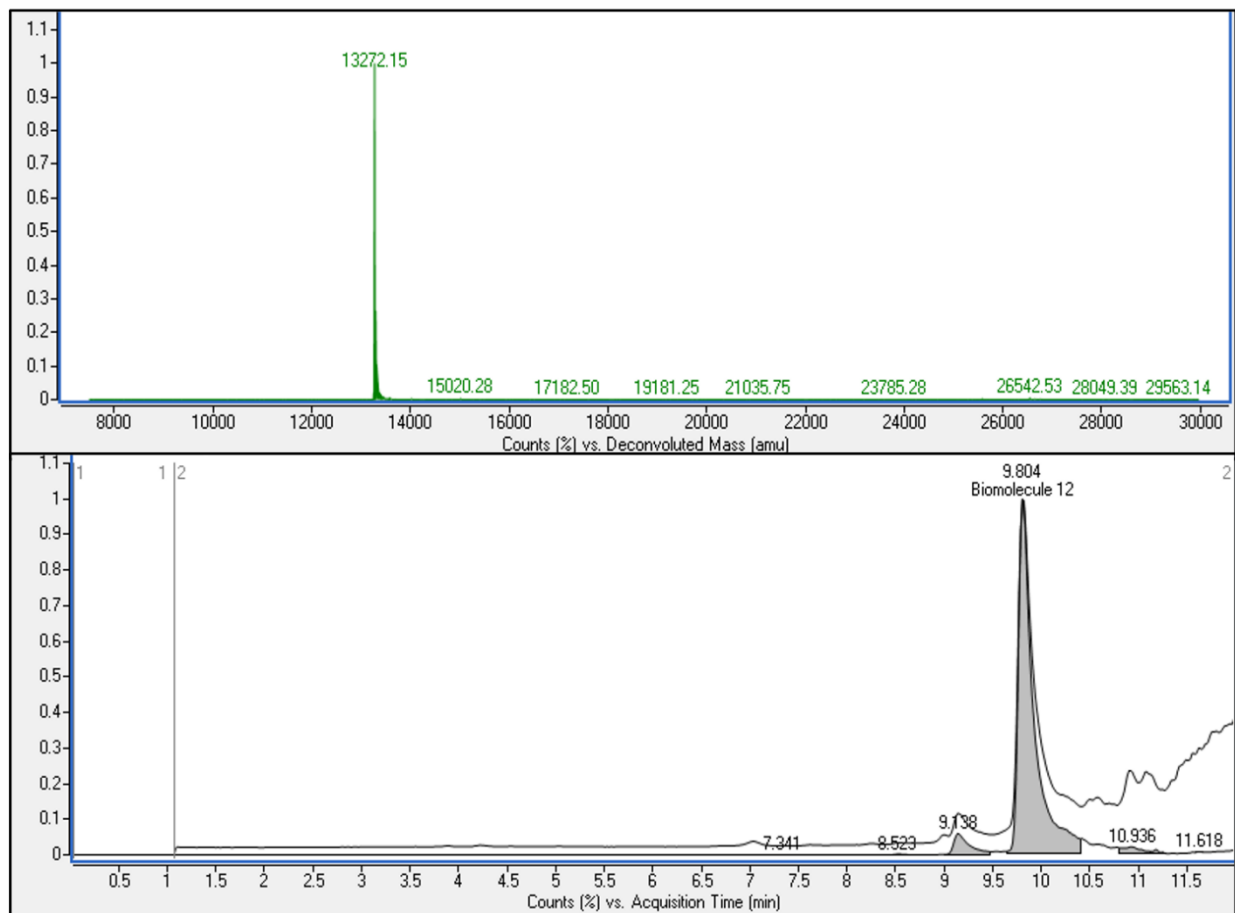



D

# Full-length SARS nsp10

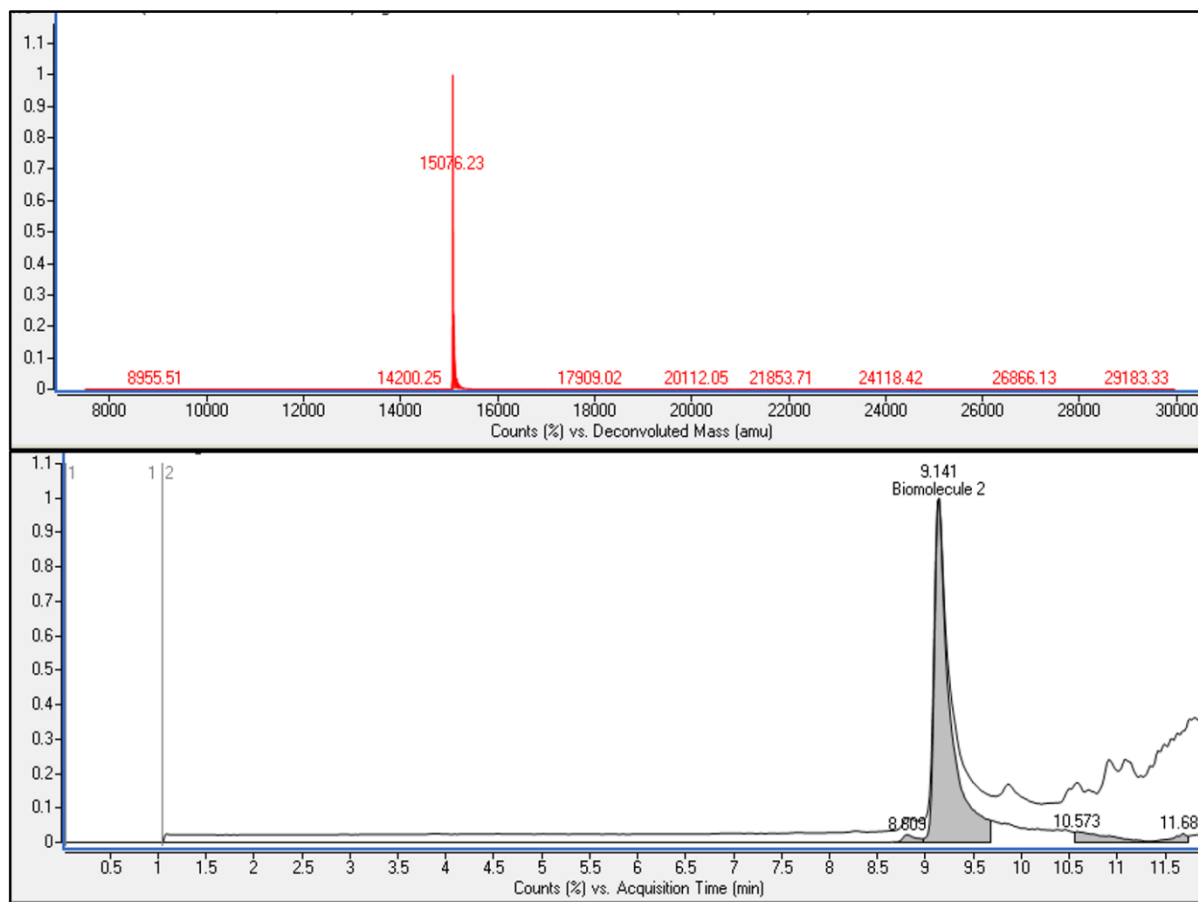

**E****Full-length MERS nsp10**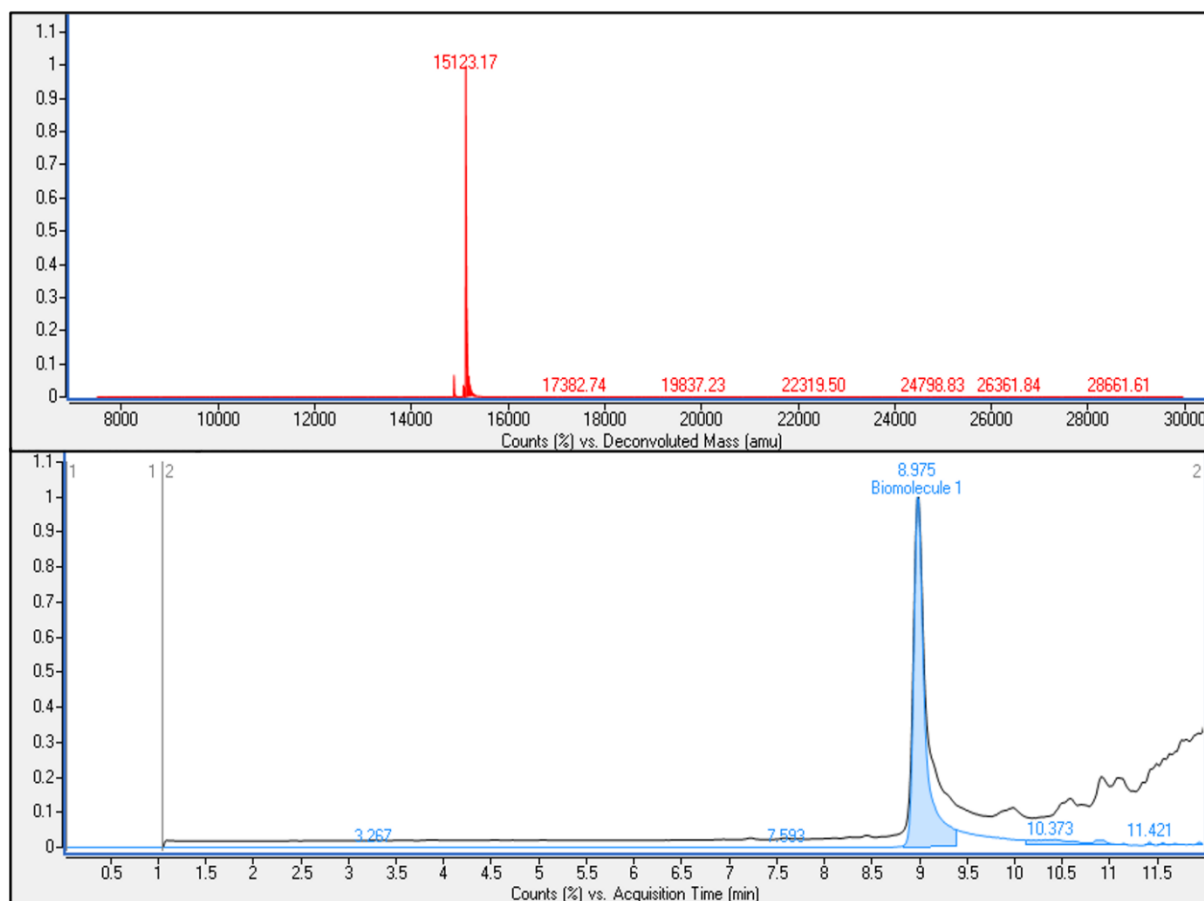

**Figure S1.** Denatured High-resolution mass spectra (HRMS) of **A)** full-length SARS-CoV-2 nsp10, **B)** long SARS-CoV-2 nsp10, **C)** short SARS-CoV-2 nsp10, **D)** full-length SARS nsp10 and **E)** full-length MERS nsp10. Deconvoluted QTOF-MS spectrums of each sample are showing in the upper panels. The signal-counts of the main peaks were normalised to 1. The calculated mass values were labelled on the top of main peaks. Chromatograms of each sample using reversed-phase chromatography are in the lower panels. The signal-counts of the main peaks were normalised to 1. The acquisition time was labelled on the top of main peaks.

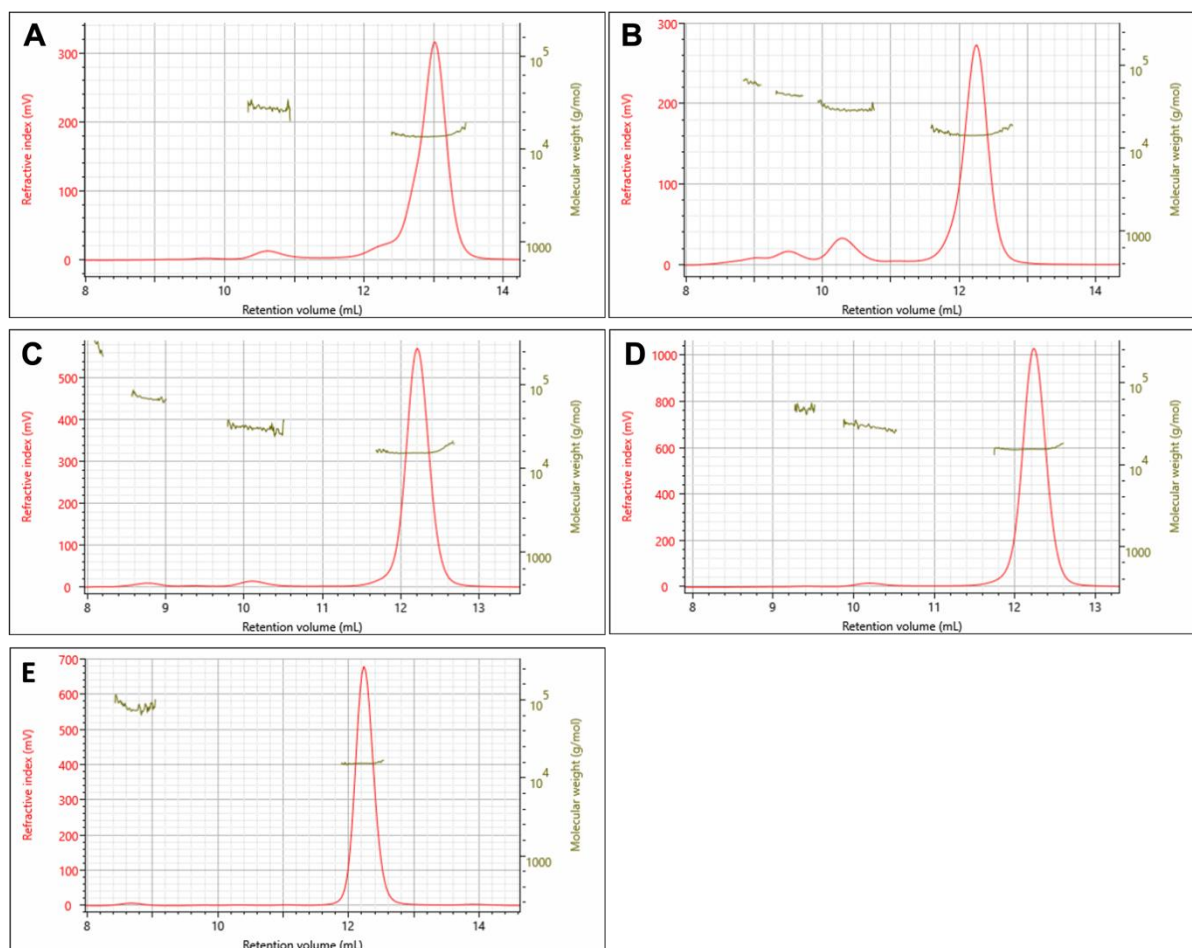

**Figure S2.** Representative OmniSEC traces. **A.** Short SARS-CoV-2 nsp10. **B.** Long SARS-CoV-2 nsp10. **C.** Full-length SARS-CoV-2 nsp10. **D.** Full-length SARS nsp10. **E.** Full-length MERS nsp10. The refractive indexes are shown in red; the determined molecular weight of the peaks are in green.

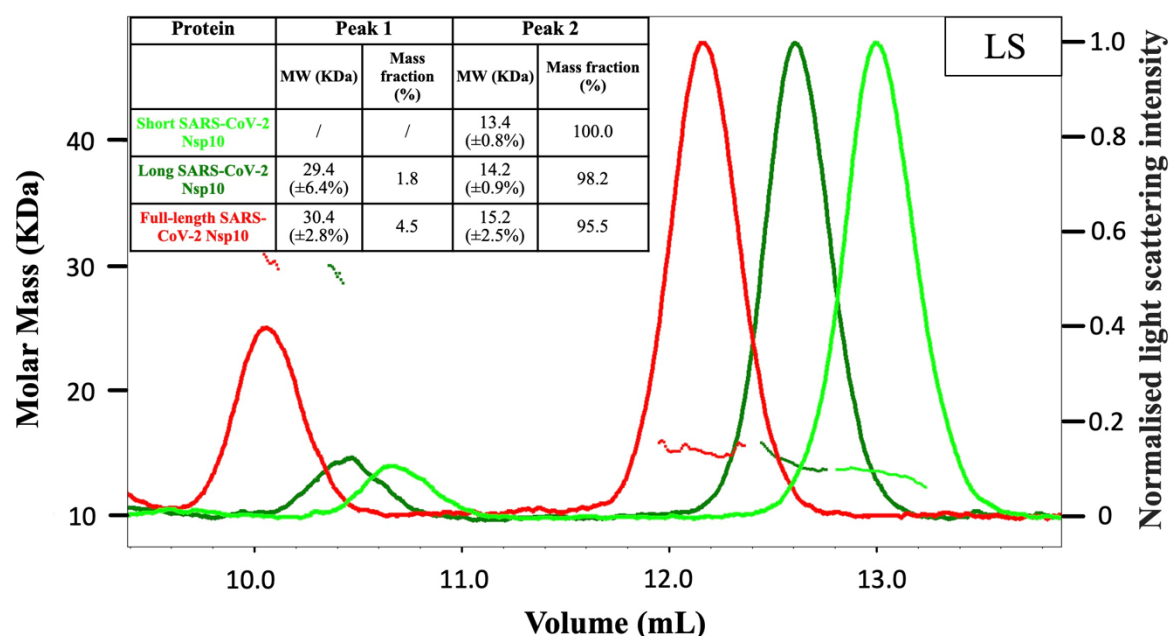

**Figure S3.** SEC-MALS analysis of three SARS-CoV-2 nsp10 constructs. Normalised light scattering (LS) peaks of short, long, and full-length SARS-CoV-2 nsp10s are coloured in light green, dark green, and red, respectively. The inset report on the molecular weight and mass fractions measured experimentally using SEC-MALS, where the lower peaks are categorised as peak 2 and the main peaks are named peak 2. The molecular weights for the second peak of short SARS-CoV-2 nsp10 was not statistically significant and therefore not included in the table.

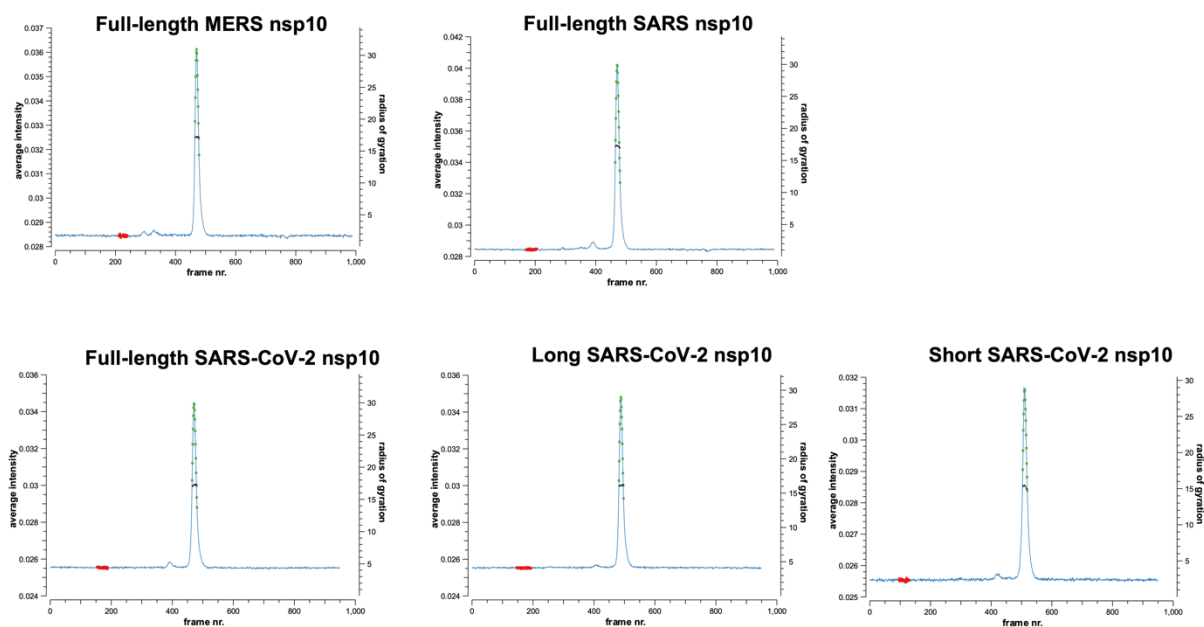

**Figure S4.** Scattering profiles for the nsp10 samples, measured by SEC/SAXS. The frames selected for buffer and peak calculations are shown as red dots. Peak frames were adjusted to generate a consistent  $R_g$  value (shown as black dots).

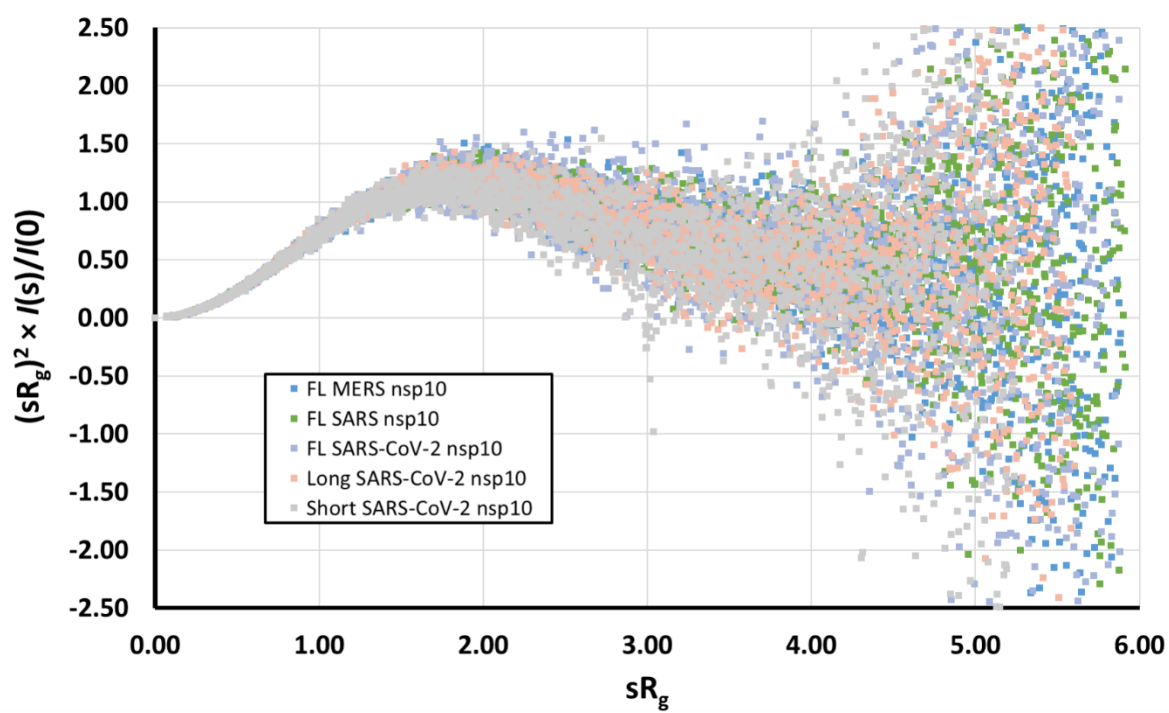

**Figure S5.** Dimensionless Kratky plots for the nsp10s measured by SAXS as shown in Fig 2.
